# Supplementary material for: miR-588 is a prognostic marker in gastric cancer
Source: publisher site journal article supplement (doi:10.18632/aging.202212), 2020-11-27
Supplement: Supplementary file [file aging-v13i2-202212-supplementary-material-SD1.pdf]

## SUPPLEMENTARY FIGURE

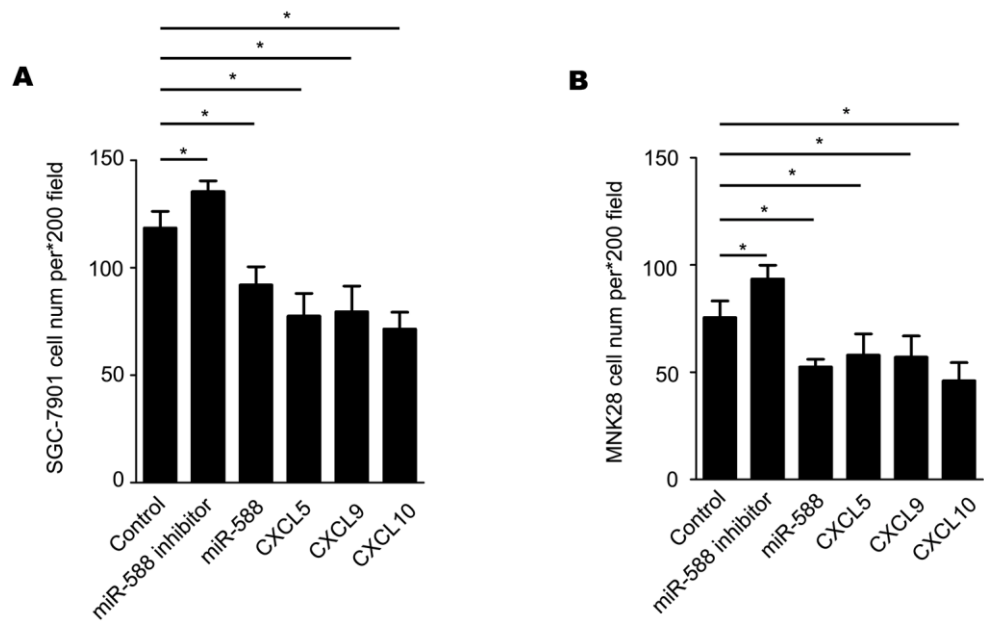

**Supplementary Figure 1. Colony number statistics.** (A, B) Cell number statistics of increased expression of miR-588, CXCL5, CXCL9, and CXCL10 in SGC-7901 and MNK28 cells. Each column represents the mean  $\pm$  SD from three repeats. \*P<0.05
